# Supplementary material for: Selection of Suitable Reference Genes for Gene Expression Normalization Studies in Dendrobium huoshanense
Source: MDPI journal article supplement (doi:10.3390/genes13081486), 2022-08-19
Supplement: s1 [file s1]

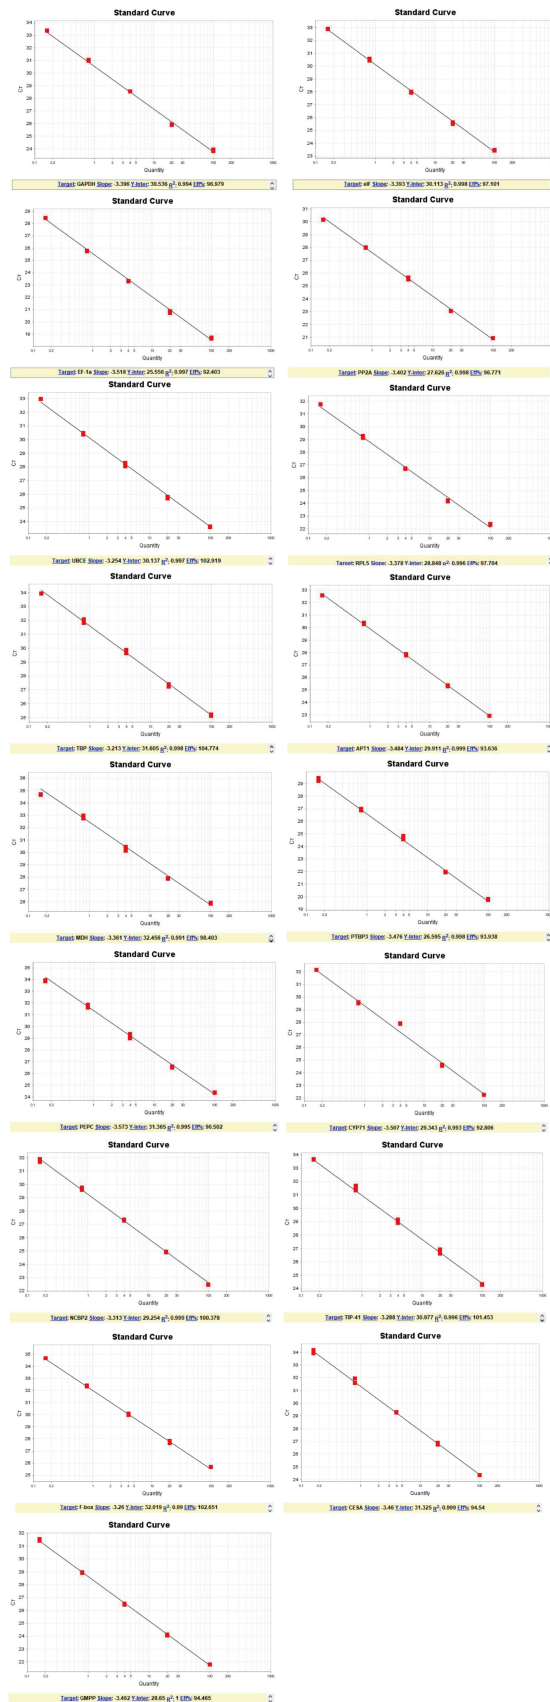

**Figure S1.** Standard curves of 15 candidate reference genes and two target genes were directly generated by StepOne™ Real-time PCR system.
