# Supplementary material for: Selection of Suitable Reference Genes for Gene Expression Normalization Studies in Dendrobium huoshanense
Source: Genes (Basel). 2022 Aug 19;13(8):1486. doi: 10.3390/genes13081486 (PMC9408602; doi:10.3390/genes13081486)
Supplement: Supplementary file 1 [file genes-13-01486-s001.zip › Table S1.xlsx]

## Sheet: Sheet1
Table S1 Information of 15 candidate reference genes and 2 target genes selected for evaluation and validation in D. huoshanense
Gene symbol	QueryID	SubjectID	Identity	Alignmentlength	Mismatch	Gap	Qstart	Qend	Sstart	Send	E-value	Score	Description	Arabidopsis homolog locus	sequence
GAPDH	SRR102959longest@DN3708_c0_g1_i3	XP_020678409.1	99.8	431	1	0	1	431	1	431	1.3e-242	849	glyceraldehyde-3-phosphate_dehydrogenase_GAPCP2,_chloroplastic_[Dendrobium_catenatum]	AT1G16300.1	ATGGCTTTTTCCGCTCTCCTCAGATCCGCCACTCCTCCTCCCCATGCTTACGGCGATTACTTCCATTCGGATTCAAGAGCTCGAGCTCCAGAGCCGTTCAAGTTTTATTGTCGGACTAGTAGATCTAGCGCCTGTTCTGCTCGGATCCGTTCGAGTACTTTATGTTCTACGCTTTCGTCGGGTGTGGCCTCAACACAGACATCTACGAAAAAAAGCTTTCACCCTACCAAAGCTACAGCAACCGAAGCACCTCCGGTTGTTCCAAGATCACCAACCGATGGGAGGACAAAGGTTGGCATCAATGGTTTTGGTCGTATTGGAAGGTTGGTCTTACGCATTGCTGCTTCTAGGGATGATATTGAGGTGGTGACCGTCAATGATCCTTTTATTGATGCTAGA…
eIF	SRR102959longest@DN5645_c0_g1_i1	XP_020691303.1	99.7	1303	4	0	1	1303	1	1303	0	2430.6	eukaryotic_translation_initiation_factor_4G_isoform_X1_[Dendrobium_catenatum]	AT3G60240.2	ATGTCCCAGCATCATTCCAGGGCTGAAAAGAACGAGGGACATCTCAGGAAATCAGGCCGTTCAGGAAACTTCGGGCAGCATAAGAGTTTCTCCGGCGGTGGAAAGGGCGGCAGCGGCGGCGGCGGCTCTAGCCCGGCTCCTGCGTTCTCGGCATCGCCTGCTACGCACCCGTCTTTTGCGCCTCATGTCTTGCCGGCTAACCGAAGTTTCAAGAAATCTGATAATGGTCAGGTAGGGCAGTCTAGGGGGAGCACGGTGTGCTCCAACTCAGATGCCGCACAGAGAACTGGAAATGATGAAGCTTATTCCACGGTCCTTTCTGATGGGTCCGCTATTCGACCTACAATCCTCAATGTTAAACCAGAGGATCCACCTAATAATCTGAAAATTGCCGGAACA…
EF-1α	SRR102959longest@DN534_c0_g1_i4	XP_020691154.1	100	447	0	0	1	447	1	447	3.4e-259	904	elongation_factor_1-alpha-like_[Dendrobium_catenatum]	AT1G07920.1	ATGGGAAAAGAGAAGGTTCACATCAATATTGTGGTCATTGGTCATGTCGACTCTGGGAAATCGACCACCACTGGTCACCTTATATACAAGCTCGGTGGTATTGATAAGCGTGTGATCGAGAGGTTTGAAAAGGAAGCCGCTGAGATGAACAAAAGATCATTCAAGTATGCATGGGTCCTCGACAAGCTCAAAGCCGAGCGCGAACGTGGTATTACCATTGATATCGCATTGTGGAAGTTCGAAACCACGAAATACTATTGTACTGTCATTGATGCTCCCGGACATCGTGATTTCATCAAAAACATGATCACTGGCACCTCTCAAGCAGATTGTGCAGTCCTTATTATCGACTCTACCACTGGAGGCTTTGAAGCAGGTATTTCCAAGGACGGACAGACT…
PP2A	SRR102959longest@DN140_c4_g1_i1	XP_020675430.1	100	587	0	0	1	587	1	587	0	1141.3	serine/threonine-protein_phosphatase_2A_65_kDa_regulatory_subunit_A_beta_isoform_[Dendrobium_catenatum]	AT3G2580.1	ATGGCTATGCTTGATGAGCCACTCTATCCGATTGCTATTCTAATTGATGAACTTAAAAATGAAGATATTCAGCTGAGATTGAACTCCATCCGCAGGCTCTCCACTATAGCAAGGGCGCTTGGTGAAGAAAGAACTAGGAAGGAGCTGATTCCTTTCCTCAGTGAGAACAATGATGACGACGACGAAGTACTTCTTGCAATGGCGGAGGAGCTGGGTGTATTTATTCCATATGTTGGAGGCGTGGAATATGCTCATGTTTTGCTTCCTCCTTTGGAGACTTTGTGTTCTGTGGAGGAAACTTGTGTCAGGGATAAAGCTGTTGAGTCATTGTGTCGAATTGGGTCTCAGATGAAGGAAAGTGATATTGTAGATTGGTTTGTTCCTTTGGTGAAGAGATTA…
UBCE	SRR102959longest@DN3472_c0_g1_i1	XP_020680335.1	99.4	179	1	0	1	179	2	180	4.3e-96	360.9	probable_ubiquitin-conjugating_enzyme_E2_C_[Dendrobium_catenatum]	AT1G50490.1	ATGGAGGTTAGAAACGAGGAAAACGCCTCCGCTACGCCCGCCTTTTCAAAGCAGACGAGGCCGGCGCCGGCCTCCGTCGACTCCGCCGCAGTCTCCCAAAGGCTTCAGAAGGAATTGATGTCGCTCATGATGAGCGGCAACCTTGGAGTATCTGCCTTTCCTGAAAGTGAAAACATATTCTCTTGGATAGGTACAATAGATGGAGGCAAGGGAACTCCATATGAAGGTTTATCTTACAAACTTTCTTTGCGCTTCCCTCTGGAATACCCATTCAAGCCTCCTCAAGTTAAATTTGAGACCTCCTGTTTCCATCCCAATGTTGACCAGTATGGGAACATTTGTCTTGACATCCTCCAGGACATGTGGTCTTCAGCATATGATTGCAGAACAGTGTTGTTG…
RPL5	SRR102959longest@DN230_c0_g1_i4	XP_020678079.1	100	292	0	0	30	321	1	292	2.3e-159	572	60S_ribosomal_protein_L5_[Dendrobium_catenatum]	AT5G39740.1	ACACAGAGTCCTCTCTCAAGCTTCCAAAGGCTCGGGAAGAAAGCCGCCTCATTAGGGTTTCCGACCTCTTCAAGCCTTTCAACAAAGATGGTTTTTGTGAAAGCCCAGAAGTCAAAAGCTTACTTTAAGCGTTTTCAAGTCAAATATAAGAGAAGAAGAGAGGGAAAGACGGATTACCGTGCTAGAATTCGCCTGATTAATCAGGATAAGAACAAGTATAACACTCCAAAGTACCGATTTGTTGTGCGATTTACGAATAGGGATATTATTGCACAAATAGCATCTGCTAGTATTGCCGGTGATATTGTTCTTGCAGCAGCTTATGCCCATGAGCTACCTCATTTTGGTCTCGAAGTTGGTCTCACTAATTATGCTGCAGCCTATTGCACTGGACTCCTT…
PTBP3	SRR102959longest@DN1718_c1_g1_i7	XP_020585273.1	81.3	391	57	2	1	378	48	435	5.7e-175	624	polypyrimidine_tract-binding_protein_homolog_3-like_[Phalaenopsis_equestris]	AT1G43190.1	ATGCATGATGTTTCTACTGCTGCTAACGTCCTGCAGTATTATGAGACTGTCCAACCAAGCATTAGGGGAAGGAATATCTACATGCAATTCTCATCACATCAAGAACTAACAACAACAGATCCCAACTCTTTAGGCACCAAAGGTGGTGAGCAGGGAATGGAGCCCAATAGAATTCTCTTAGTTACTGTACATTCAATGCTCCACCCCATAACTGTGGAAGTGCTGCATCAAGTTTTTTCTCCATATGGGTTTGTGGAAAAGATTGTCACCTTTCATAAATTGGCAGGTTTTCAAGCTCTTATTCAATATCATTTACATCAGAGTGCTCTACAAGCAAAGATTGCTTTGCAGGGGCGGAATATATACGATGGTTGTTGTCAGCTTGACATACAATTTTCC…
MDH	SRR102959longest@DN15926_c0_g1_i2	XP_020704814.1	98.8	332	4	0	1	332	1	332	7.3e-182	646.7	malate_dehydrogenase_[Dendrobium_catenatum]	AT5G43330.1	ATGGCAAAGGATCCAATTAGCGTTCTTGTAACCGGTGCCGCAGGGCAAATTGGGTATGCTCTTGTACCGATGATTGCTCGGGGTGTAATGCTTGGTCCTGACCAGCCTGTTAGGTTGCATTTGCTTGACATTCCACCCGCTGCAGAAGCTCTCAATGGCGTTAAAATGGAGTTGATTGATGCTGCATTCCCACTCCTTAAGGGAGTTGTTGCTACAACTGATGTTATTGAGGCTTGCACTGGAGTCAATATAGCTGTGATGGTTGGTGGGTTCCCAAGGAAGGAAGGTATGGAAAGGAAGGATGTGATGTCAAAGAATGTATCTATCTACAAGTCACAAGCTTCAGCCCTTGAACAGCATGCAGCAGCCGGCTGCAAGGTCTTGGTTGTGGCTAATCCA…
PEPC	SRR102959longest@DN893_c1_g1_i11	XP_028548050.1	98.5	596	5	1	1	596	1	592	0	1185.6	phosphoenolpyruvate_carboxykinase_(ATP)_[Dendrobium_catenatum]	AT4G37870.1	ATGGCAACAGATGGCCAGGCGAGCAACATGGACAATAACTTGGCTAATGGCAGCAGTGTTGCCGCCAGCGCCCAGCCTCCTCGACGGGGTGTGTTGCCGAGGATCCAGACGAGGATAACAACAATGGCTGCAAGCAAGCCGTATAAGGCAGAGAACAATATCTGCCATGACGATAGTTCACGACCTGTGAAAGCTCAGACCATAGATGAGCTGCATTCACTGCAAAAGAAGAGGTCTGCTCCTAGTACACCAATCAAACAGGAAGTCACCGCCCAGTCCCCCACTGCCTTTTCTACTATATCTGAAGAAGAGCGCCAGAGGCTCCAGCTCCAATCCATCAGTGCTTCATTGGCATCGCTGACGAGGGAGAGTGGTCCAAAGGTGGTAAAGGGAGACCCT…
F-box	SRR102959longest@DN6958_c0_g1_i1	XP_020700007.1	99.8	620	1	0	1	620	4	623	0	1278.5	F-box_protein_At5g39450_[Dendrobium_catenatum]	AT5G39450.1	ATGCCGGCAGATGGCAGGCTGGAATCAGGCTGCAGCGCCCGCAGCACTGATGAAGATCGGCTGCCTTGCGGCTCCTACCTCTTCCTGAACCTCCCGGAAGACGTCCTCGCCCTGATCTCACTCTATCTCTCTCCTCGCGACCTCTGCAACCTCTCCCTTTCCTCCCGCCCCCTCTGCTCCGCTGTATCCACGTCAGAAAAGATCTGGCTTTCTCAGTGCCGACGCGCGGGCCTCCCACCTCCGCTACTTTCCCGATGGCGAGCTGGCGTCCGATCCCATCGCGCCCTTTGCCGCTTCCTATACGCTGTATCCCCTCTTCTTGGCCTCTGGGTGCACCAAAACCCCGAGCTTGGGAACGTAGTATTCGTACTCTGGGGTTTCCTCTCCGTTGTTGGGTGC…
TBP	SRR102959longest@DN7137_c0_g1_i15	XP_020695622.1	99.3	141	1	0	1	141	1	141	3.8e-70	274.6	TATA-box-binding_protein-like_[Dendrobium_catenatum]	AT1G55520.1	ATGGCAGAGGGCTTGGAGGGGAGTCAGCCGGTTGATCTAGCCAGGCATCCTTCTGGTATTGTCCCCACGTTGCAGAATATTGTTTCAACTGTTAACTTGGATTGCAAGCTGGATCTTAAAGCAATTGCCTTGCAAGCCAGAAATGCTGAGTACAACCCCAAGCGTTTTGCAGCAGTTATAATGAGAATTAGAGAACCTAAAACCACTGCACTGATCTTTGCATCAGGAAAAATGGTGTGCACTGGAGCTAAGAGTGAAATGCAGTCCAAGCTTGCTGCTCGGAAGTATGCTCGTATTATCCAGAAGCTTGGCTTTGCTGCCAAATTCAAGGATTTTAAGATTCAAAATATTGTTGGTTCTTGTGATGTGAAGTTTCCCATAAGGCTTGAAGGGTTGGCT…
TIP41	SRR102959longest@DN1958_c0_g1_i1	XP_020695801.1	100	288	0	0	1	288	1	288	2.3e-168	601.7	TIP41-like_protein_isoform_X1_[Dendrobium_catenatum]	AT4G34270.1	ATGGAGAACGGCGTCGGCACGGAGAAGGATCTCAATGAGGCAGGGGCGGAAGCGCTTCCGGATGGCCGCTGTGGCATTCGGATCAAAGGATGGCAGATCGAGTCATGCAAGCGCCCAATACTGGGTTCTCTCGCTCTTCGAGAGTGGGAAGAAAAGCTTGGAACCTCACACCTACCTGAAATGGTTTTTGGAGATAGTTCATTGAATCTCTTACATATGGAAAGTGGTTTTAAGATACATTTTAATGCATTTGATGCATTGAAAGGTTGGAAGCAAGAGTCATTACCACCGGTAGAAGTCCCTGCAGCAGCAAAATGGAAATTTAGAAGCAAGCCTGTCCAACAAATTATACTTGATTATGACTATACATTCACGACACCATATTGTGGCAGCGAAGCA…
CYP71	SRR102959longest@DN5282_c0_g2_i2	XP_020687313.1	100	620	0	0	1	620	1	620	0	1262.7	peptidyl-prolyl_cis-trans_isomerase_CYP71_isoform_X1_[Dendrobium_catenatum]	AT3G44600.1	ATGGAAGAAGCTTCAAATGGAAGGCTTGATCCTCCAGCGGATGAAGATGAGGATGAACCCATCGTAGGCCCCGGCCCAGCTCCCCGTGTCCGCCCTAAGCGCCCTCTCAAATTCGAGCAAGCATTTCTCGATACTCTCCCCTCTGCCAATATGTATGAAAAGAGTTACATGCACCGTGATGTAGTTACACATGTTGCAGTGTCAGCGGCAGACTTTCTTATAACAGGAAGCTATGATGGCCATCTCAAGTTCTGGAAGAAAAAGCCTGTTGGGATCGAATTTGCTAAACATTTTAGATCTCATCTTGGTCCAATTGAAGGCTTAGCTGTCAGTGTTGATGGCTTATTTTGCTGCACAATCTCATCCGATCAGTCCGTGAAAATTTATGATGTTGTCAAC…
NCBP2	SRR102959longest@DN16021_c0_g1_i4	XP_020689552.1	100	138	0	0	1	138	1	138	7.8e-75	290	nuclear_cap-binding_protein_subunit_2_[Dendrobium_catenatum]	AT5G44200.1	ATGGCGTCTCTGTTCAAGGACCCGAACAAGCTTTCGGCTTATAGGGATAGAAGGTTCCAAGGCACCCAGGAAGAGTACGAGCATGCTTTGCAAACCTCGATAACAGTTTATATTGGCAATTTGTCGTTCTACACAACTGAAGAGCAGGTTTATGAGCTCTTCTCCCGTGCTGGAGAGATCAAAAAGATAATTATGGGTCTAGATAAGAACAGCAAGACTCCCTGTGGCTTTTGCTTCGTCTTGTATTATTCTAGGGAAGATGCCGAAGATGCAGTTAAATATATCAGTGGGACCATTCTAGATGATCGTTCTATTCGTGTAGACTTTGACTGGGGATTTGAAGAAGGAAGACAATGGGGTCGTGGTCGTAGTGGCGGACAGGTGCGCGATGAGTATCGT…
APT1	SRR102959longest@DN1330_c0_g1_i1	XP_020705481.1	100	180	0	0	1	180	1	180	4.1e-94	354.4	adenine_phosphoribosyltransferase_1_[Dendrobium_catenatum]	AT1G27450.1	ATGGCGTCCGTGGATGAACAGACTCGGATCAAGAGGATTGCGTCCTCGATCCGCGTCATTCCCGACTTCCCTAAGCCTGGTGTTATGTTTCAAGATATCACGACGCTGCTGCTGGATCCCAAAGCGTTTAGGGATACTGTGGAGTTGTTTGTGGAGAGGTACAGGGACATGCGGATCTCTGTTGTGGCTGGTGTTGAAGCTAGAGGGTTTATCTTTGGCCCTCCCATTGCTCTTTCGATTGGAGCAAAATTTGTACCTTTGAGGAAGCCAAAAAAGCTACCAGGTGAAGTAATTTCAGAAGAATATTCTCTAGAATATGGTACAGATACAATGGAGATGCATGTTGGTGCTGTCCAATTTAATGATCGTGTCCTTGTTATTGATGACCTTATTGCAACT…
CESA	SRR102959longest@DN26106_c0_g1_i1	XP_020685326.1	97.5	651	12	1	1	647	1	651	0	1288.1	cellulose_synthase-like_protein_D2_[Dendrobium_catenatum]	AT3G03050.1	ATGCCGATGGCTAACACGAACCAAGCTCTGCGAGCAAGCTGGTCGGCCCGTTTTCCGCCGCCGGCGACGGGAAACCAAACAGTGGCCTTTGGCCACCGGACACAGTCCGGGAGGAACATCAGCTACTCCCGCGACGACCTTGACAGTGAGCTCGGCAGCGGCGAGCACTCCAAGGAGTTTCTCAGCTACCATGTCCACATCCCTTCTACTCCCGACAACCAGCCAATGGACTCTGCAGCATCAACGAATCTTGATCCATCAATCTCCGCCCGCGTGGAGGAGCAGTACGTCTCGAACTCTCTCTTTACCGGTGGATTCAACAGTGTTACCCGCGCACAGCTTATGAACAAGGTGATCGACTCTGAGTCGAGCCACCCGCAGATGGCCGGAGCCAAGGGT…
GMPP	SRR102959longest@DN4280_c0_g1_i15	XP_020687968.1	100	415	0	0	1	415	1	415	6.4e-220	773.5	mannose-1-phosphate_guanyltransferase_alpha_[Dendrobium_catenatum]	AT1G74910.1	TTCAGCATGAAGCGGGATCCATACAAGAACAAAGTCCGGTCGGATTTTGTAAAAGATAGGAGACGATTGAAGCGAGAATACGAGGAGTTCAAAGTCCGTATCAATAGTCTGCCGGACTCCATTCGTCGTCGGTCTGATGCTTACCATGCCCGGGAAGAGATCAAAGCAGTGAAGCGGCAACGAGAAGCTCCTCTCAACGAACCTGTAGAACCTGTTAAGATCCAAAAGGCTACGTGGATGGCCGATGGGACTCATTGGCCCGGCACTTGGGTTTACTCTGCAGCTGAACATTCTCGAGGAGATCATGCTGGAATTATTCAGGTGATGCTGAAACCCCCAAGTGACGAGCCTTTGCTTGGTAACAATGATGAAATGAAATCTTTTGATCTCACTGAAGTT…
