# Supplementary material for: Selection of Suitable Reference Genes for Gene Expression Normalization Studies in Dendrobium huoshanense
Source: Genes (Basel). 2022 Aug 19;13(8):1486. doi: 10.3390/genes13081486 (PMC9408602; doi:10.3390/genes13081486)
Supplement: Supplementary file 1 [file genes-13-01486-s001.zip › Table S2.xlsx]

## Sheet: Sheet1
				Table S2 Expression stability rankings of the 15 candidate reference genes estimated by geNorm, NormFinder, BestKeeper and RefFinder
				Method	Ranking order (The 1 st is the most stable, and the 15 th is the least stable)
					1	2	3	4	5	6	7	8	9	10	11	12	13	14	15
				group set	Total
				geNorm	APT1	NCBP2	MDH	UBCE	TBP	CYP71	EF-1α	RPL5	PP2A	eIF	F-box	PTBP3	PEPC	TIP41	GAPDH
				NormFinder	NCBP2	MDH	APT1	UBCE	TBP	CYP71	PP2A	EF-1α	RPL5	eIF	F-box	PTBP3	PEPC	TIP41	GAPDH
				BestKeeper	MDH	TBP	PTBP3	UBCE	CYP71	NCBP2	F-box	APT1	EF-1α	eIF	PP2A	PEPC	RPL5	TIP41	GAPDH
				RefFinder	MDH	NCBP2	UBCE	TBP	CYP71	APT1	PP2A	EF-1α	PTBP3	RPL5	eIF	F-box	PEPC	TIP41	GAPDH
				group set	H2O2
				geNorm	TBP	NCBP2	eIF	RPL5	MDH	PTBP3	CYP71	APT1	EF-1α	PEPC	UBCE	F-box	PP2A	GAPDH	TIP41
				NormFinder	TBP	NCBP2	eIF	RPL5	PTBP3	MDH	CYP71	APT1	EF-1α	UBCE	F-box	PEPC	PP2A	GAPDH	TIP41
				BestKeeper	TBP	RPL5	NCBP2	eIF	PTBP3	MDH	CYP71	APT1	UBCE	F-box	PEPC	EF-1α	GAPDH	PP2A	TIP41
				RefFinder	TBP	RPL5	NCBP2	eIF	PTBP3	MDH	CYP71	APT1	EF-1α	UBCE	PEPC	F-box	PP2A	GAPDH	TIP41
				group set	PEG
				geNorm	NCBP2	CYP71	TBP	PP2A	eIF	APT1	PTBP3	UBCE	RPL5	F-box	EF-1α	MDH	PEPC	TIP41	GAPDH
				NormFinder	NCBP2	CYP71	TBP	PP2A	eIF	UBCE	APT1	PTBP3	RPL5	MDH	F-box	EF-1α	PEPC	TIP41	GAPDH
				BestKeeper	NCBP2	CYP71	TBP	eIF	PP2A	APT1	UBCE	PTBP3	RPL5	F-box	MDH	EF-1α	PEPC	TIP41	GAPDH
				RefFinder	CYP71	NCBP2	TBP	PP2A	eIF	APT1	UBCE	PTBP3	RPL5	F-box	MDH	EF-1α	PEPC	TIP41	GAPDH
				group set	MeJA
				geNorm	TBP	APT1	PP2A	EF-1α	eIF	PTBP3	MDH	NCBP2	CYP71	F-box	RPL5	UBCE	PEPC	GAPDH	TIP41
				NormFinder	TBP	APT1	PP2A	EF-1α	eIF	PTBP3	MDH	NCBP2	CYP71	F-box	RPL5	PEPC	UBCE	GAPDH	TIP41
				BestKeeper	eIF	EF-1α	TBP	APT1	NCBP2	MDH	PTBP3	PP2A	CYP71	F-box	PEPC	UBCE	RPL5	GAPDH	TIP41
				RefFinder	APT1	TBP	EF-1α	PP2A	eIF	MDH	PTBP3	NCBP2	CYP71	F-box	RPL5	PEPC	UBCE	GAPDH	TIP41
				group set	UV
				geNorm	CYP71	EF-1α	TBP	NCBP2	APT1	UBCE	PP2A	MDH	eIF	PTBP3	F-box	PEPC	RPL5	GAPDH	TIP41
				NormFinder	EF-1α	CYP71	NCBP2	TBP	UBCE	APT1	PTBP3	F-box	PEPC	MDH	RPL5	PP2A	eIF	TIP41	GAPDH
				BestKeeper	EF-1α	CYP71	TBP	UBCE	NCBP2	PTBP3	MDH	PEPC	APT1	RPL5	PP2A	F-box	eIF	TIP41	GAPDH
				RefFinder	EF-1α	CYP71	NCBP2	APT1	TBP	PEPC	UBCE	PTBP3	RPL5	MDH	F-box	PP2A	TIP41	GAPDH	eIF
				group set	Cold
				geNorm	TBP	CYP71	PP2A	eIF	UBCE	APT1	TIP41	MDH	EF-1α	PEPC	RPL5	GAPDH	NCBP2	F-box	PTBP3
				NormFinder	TBP	CYP71	PP2A	APT1	UBCE	eIF	TIP41	EF-1α	GAPDH	PEPC	MDH	NCBP2	RPL5	F-box	PTBP3
				BestKeeper	EF-1α	UBCE	CYP71	APT1	TBP	NCBP2	GAPDH	PTBP3	PP2A	TIP41	RPL5	MDH	eIF	F-box	PEPC
				RefFinder	TBP	CYP71	PP2A	UBCE	APT1	EF-1α	eIF	GAPDH	TIP41	MDH	NCBP2	PEPC	RPL5	PTBP3	F-box
				group set	Tissue
				geNorm	RPL5	MDH	NCBP2	TBP	UBCE	CYP71	eIF	EF-1α	APT1	F-box	PTBP3	PEPC	PP2A	GAPDH	TIP41
				NormFinder	MDH	NCBP2	RPL5	UBCE	TBP	CYP71	F-box	APT1	eIF	PTBP3	EF-1α	PEPC	PP2A	GAPDH	TIP41
				BestKeeper	PTBP3	PEPC	UBCE	TBP	EF-1α	F-box	NCBP2	CYP71	APT1	MDH	RPL5	eIF	GAPDH	TIP41	PP2A
				RefFinder	MDH	RPL5	NCBP2	UBCE	TBP	PTBP3	EF-1α	CYP71	F-box	eIF	APT1	PEPC	PP2A	GAPDH	TIP41
